# Supplementary material for: Relationship of Triamine-Biocide Tolerance of Salmonella enterica Serovar Senftenberg to Antimicrobial Susceptibility, Serum Resistance and Outer Membrane Proteins
Source: MDPI journal article supplement (doi:10.3390/ijms18071459), 2017-07-11
Supplement: s1 [file s1]

# **MASCOT** Mascot Search Results

## Protein View

Match to: **ENO\_SALAR** Score: **61**

**Enolase OS=Salmonella arizonae (strain ATCC BAA-731 / CDC346-86 / RSK2980) GN=eno PE=3 SV=1**  
Found in search of 281474976711718.mgf

Nominal mass ( $M_r$ ): **45628**; Calculated pI value: **5.25**

NCBI BLAST search of [ENO\\_SALAR](#) against nr

Unformatted [sequence string](#) for pasting into other applications

Taxonomy: [Salmonella enterica subsp. arizonae serovar 62:z4,z23:--](#)

Fixed modifications: Carboxymethyl (C)

Variable modifications: Oxidation (M)

Cleavage by Trypsin: cuts C-term side of KR unless next residue is P

Sequence Coverage: **3%**

Matched peptides shown in **Bold Red**

```
1 MSKIVKVIGR EIIDSRGNPT VEAHVHLEGG FVGMAAAPSG ASTGSREALE
51 LRDGDKSRFL GKGVTKAVGA VNGPIAQAIL GKDAKDQAGI DKIMIDLDT
101 ENKSNFGANA ILAVSLANAK AAAAAGMPL YEHI AELNGT PGKYSMPVPM
151 MNIINGGEHA DNNVDIQEFM IQPVGAKTVK EAIRMGSEVF HHLAKVLKKG
201 GMNTAVGDEG GYAPNLGSNA EALAVIAEAV KAAGYELGKD ITLAMDC AAS
251 EFYKDGKYVL AGEGNAFTS EEFTHFLEEL TKQYPIVSIE DGLDESDWDG
301 FAYQTKVLGD KIQLVGDDLF VTNTKILKEG IEKGIANSIL IKFNQIGSLT
351 ETLAAIKMAK DAGYTAVISH RSGETEDATI ADLAVGTAAG QIKTGSMRSR
401 DRVAKYNQLI RIEEALGEKA PYNGRKEIKG QA
```

Show predicted peptides also

Sort Peptides By

☒ Residue Number ☐ Increasing Mass ☐ Decreasing Mass

| Start - End      | Observed         | Mr(expt)         | Mr(calc)         | ppm        | Miss     | Sequence                                                             |
|------------------|------------------|------------------|------------------|------------|----------|----------------------------------------------------------------------|
| <b>267 - 282</b> | <b>1928.8306</b> | <b>1927.8233</b> | <b>1927.9203</b> | <b>-50</b> | <b>0</b> | <b>K.AFTS<b>EEFTHFLEEL</b>TK.Q</b> ( <a href="#">Ions score 61</a> ) |

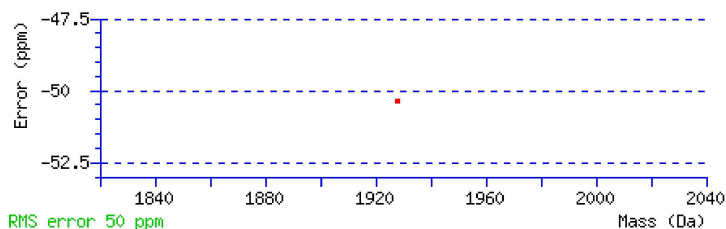

ID ENO\_SALAR Reviewed; 432 AA.  
AC A9MF11;  
DT 20-MAY-2008, integrated into UniProtKB/Swiss-Prot.  
DT 05-FEB-2008, sequence version 1.  
DT 16-MAY-2012, entry version 31.  
DE RecName: Full=Enolase;  
DE EC=4.2.1.11;  
DE AltName: Full=2-phospho-D-glycerate hydro-lyase;  
DE AltName: Full=2-phosphoglycerate dehydratase;  
GN Name=eno; OrderedLocusNames=SARI\_00009;  
OS Salmonella arizonae (strain ATCC BAA-731 / CDC346-86 / RSK2980).  
OC Bacteria; Proteobacteria; Gammaproteobacteria; Enterobacteriales;  
OC Enterobacteriaceae; Salmonella.  
OX NCBI\_TaxID=41514;  
RN [1]  
RP NUCLEOTIDE SEQUENCE [LARGE SCALE GENOMIC DNA].  
RC STRAIN=ATCC BAA-731 / CDC346-86 / RSK2980;  
RG The Salmonella enterica serovar Arizonae Genome Sequencing Project;  
RA McClelland M., Sanderson E.K., Porwollik S., Spieth J., Clifton W.S.,  
RA Fulton R., Chunyan W., Wollam A., Shah N., Pepin K., Bhonagiri V.,  
RA Nash W., Johnson M., Thiruvilangam P., Wilson R.;  
RL Submitted (NOV-2007) to the EMBL/GenBank/DDBJ databases.  
CC -!- FUNCTION: Catalyzes the reversible conversion of 2-  
CC phosphoglycerate into phosphoenolpyruvate. It is essential for the  
CC degradation of carbohydrates via glycolysis. It is also a

CC component of the RNA degradosome, a multi-enzyme complex involved  
 CC in RNA processing and messenger RNA degradation. Its interaction  
 CC with RNase E is important for the turnover of mRNA, in particular  
 CC on transcripts encoding enzymes of energy-generating metabolic  
 CC routes. Its presence in the degradosome is required for the  
 CC response to excess phosphosugar. May play a regulatory role in the  
 CC degradation of specific RNAs, such as ptsG mRNA, therefore linking  
 CC cellular metabolic status with post-translational gene regulation  
 CC (By similarity).  
 CC -!- CATALYTIC ACTIVITY: 2-phospho-D-glycerate = phosphoenolpyruvate +  
 CC H(2)O.  
 CC -!- COFACTOR: Magnesium. Required for catalysis and for stabilizing  
 CC the dimer (By similarity).  
 CC -!- ENZYME REGULATION: The covalent binding to the substrate causes  
 CC inactivation of the enzyme, and possibly serves as a signal for  
 CC the export of the protein (By similarity).  
 CC -!- PATHWAY: Carbohydrate degradation; glycolysis; pyruvate from D-  
 CC glyceraldehyde 3-phosphate: step 4/5.  
 CC -!- SUBUNIT: Homodimer. Interacts with the C-terminal region of the  
 CC endoribonuclease RNase E in the RNA degradosome (By similarity).  
 CC -!- SUBCELLULAR LOCATION: Cytoplasm, cytoskeleton. Secreted. Cell  
 CC surface. Note=Fractions of enolase are present in both the  
 CC cytoplasm and on the cell surface. As part of the bacterial  
 CC cytoskeleton in the cytoplasm, is organized as extended coiled  
 CC structures that wind around the cell, from one cell pole to the  
 CC other. The export of enolase possibly depends on the covalent  
 CC binding to the substrate; once secreted, it remains attached to  
 CC the bacterial cell surface (By similarity).  
 CC -!- SIMILARITY: Belongs to the enolase family.  
 CC -----  
 CC Copyrighted by the UniProt Consortium, see <http://www.uniprot.org/terms>  
 CC Distributed under the Creative Commons Attribution-NoDerivs License  
 CC -----  
 DR EMBL; CP000880; ABX19963.1; -; Genomic\_DNA.  
 DR RefSeq; YP\_001569105.1; NC\_010067.1.  
 DR ProteinModelPortal; A9MF11; -.  
 DR SMR; A9MF11; 2-432.  
 DR STRING; A9MF11; -.  
 DR PRIDE; A9MF11; -.  
 DR GeneID; 5760517; -.  
 DR GenomeReviews; CP000880\_GR; SARI\_00009.  
 DR KEGG; ses:SARI\_00009; -.  
 DR PATRIC; 18469205; VBISalEnt13497\_0010.  
 DR eggNOG; COG0148; -.  
 DR HOGENOM; HOG000072174; -.  
 DR KO; K01689; -.  
 DR OMA; QEYMIMP; -.  
 DR ProtClustDB; PRK00077; -.  
 DR GO; GO:0009986; C:cell surface; IEA:UniProtKB-SubCell.  
 DR GO; GO:0005856; C:cytoskeleton; IEA:UniProtKB-SubCell.  
 DR GO; GO:0005576; C:extracellular region; IEA:UniProtKB-SubCell.  
 DR GO; GO:0000015; C:phosphopyruvate hydratase complex; IEA:InterPro.  
 DR GO; GO:0000287; F:magnesium ion binding; IEA:InterPro.  
 DR GO; GO:0004634; F:phosphopyruvate hydratase activity; IEA:EC.  
 DR GO; GO:0006096; P:glycolysis; IEA:UniProtKB-KW.  
 DR HAMAP; MF\_00318; Enolase; 1; -.  
 DR InterPro; IPR000941; Enolase.  
 DR InterPro; IPR020810; Enolase\_C.  
 DR InterPro; IPR020809; Enolase\_CS.  
 DR InterPro; IPR020811; Enolase\_N.  
 DR PANTHER; PTHR11902; Enolase; 1.  
 DR Pfam; PF00113; Enolase\_C; 1.  
 DR Pfam; PF03952; Enolase\_N; 1.  
 DR PIRSF; PIRSF001400; Enolase; 1.  
 DR PRINTS; PR00148; ENOLASE.  
 DR TIGRFAMS; TIGR01060; Eno; 1.  
 DR PROSITE; PS00164; ENOLASE; 1.  
 PE 3: Inferred from homology;  
 KW Complete proteome; Cytoplasm; Cytoskeleton; Glycolysis; Lyase;  
 KW Magnesium; Metal-binding; Phosphoprotein; Secreted.  
 FT CHAIN 1 432 Enolase.  
 FT /FTId=PRO\_1000079147.  
 FT REGION 369 372 Substrate binding (By similarity).  
 FT ACT\_SITE 209 209 Proton donor (By similarity).  
 FT ACT\_SITE 342 342 Proton acceptor (By similarity).  
 FT METAL 246 246 Magnesium (By similarity).  
 FT METAL 290 290 Magnesium (By similarity).  
 FT METAL 317 317 Magnesium (By similarity).  
 FT BINDING 159 159 Substrate (By similarity).  
 FT BINDING 168 168 Substrate (By similarity).

|    |             |                                           |             |                                         |
|----|-------------|-------------------------------------------|-------------|-----------------------------------------|
| FT | BINDING     | 290                                       | 290         | Substrate (By similarity).              |
| FT | BINDING     | 317                                       | 317         | Substrate (By similarity).              |
| FT | BINDING     | 342                                       | 342         | Substrate (covalent); in inhibited form |
| FT |             |                                           |             | (By similarity).                        |
| FT | BINDING     | 393                                       | 393         | Substrate (By similarity).              |
| FT | MOD_RES     | 284                                       | 284         | Phosphotyrosine (By similarity).        |
| SQ | SEQUENCE    | 432 AA; 45599 MW; 2A9984B6784DCD08 CRC64; |             |                                         |
|    | MSKIVKVIGR  | EIIDSRGNPT                                | VEAEVHLEGG  | FVGMAAAPSG ASTGSREALE LRDGDKSRFL        |
|    | GKGVTTKAVGA | VNGPIAQAIL                                | GKDAKQAGI   | DKIMIDLDT ENKSNFNGA ILAVSLANAK          |
|    | AAAAAGMPL   | YEHIAELNGT                                | PGKYSMPVPM  | MNIINGGEHA DNNVDIQEFM IQPVGAKTVK        |
|    | EAIRMGSEVF  | HHLAKVLKKG                                | GMNTAVGDGEG | GYPALNGSNA EALVAIAEAV KAAGVELGKD        |
|    | ITLAMDCAS   | EFYKDGKYVL                                | AGEGNAKFTS  | EEFTHFLEEL TKQYPIVSIE DGLDESDWDG        |
|    | FAYQTKVLGD  | KIQLVGDDLF                                | VTNTKILKEG  | IEKGIANSIL IKFNQIGSLT ETLAAIKMAK        |
|    | DAGYTAIVSH  | RSGETEDATI                                | ADLAVGTAAG  | QIKTGSMRS DRVAKYNQLI RIEEALGEKA         |
|    | PYNGRKEIQG  | KA                                        |             |                                         |

**Mascot:** <http://www.matrixscience.com/>
