# Supplementary material for: Relationship of Triamine-Biocide Tolerance of Salmonella enterica Serovar Senftenberg to Antimicrobial Susceptibility, Serum Resistance and Outer Membrane Proteins
Source: MDPI journal article supplement (doi:10.3390/ijms18071459), 2017-07-11
Supplement: s1 [file s1]

# **Mascot Search Results**

## Protein View

Match to: **FLIC\_SALCH** Score: **101**

**Flagellin OS=Salmonella choleraesuis (strain SC-B67) GN=fliC PE=3 SV=3**

Found in search of 281474976711690.mgf

Nominal mass ( $M_r$ ): **52081**; Calculated pI value: **4.85**

NCBI BLAST search of [FLIC\\_SALCH](#) against nr

Unformatted [sequence string](#) for pasting into other applications

Taxonomy: [Salmonella enterica subsp. enterica serovar Choleraesuis str. SC-B67](#)

Variable modifications: Carboxymethyl (C), Oxidation (M)

Cleavage by Trypsin: cuts C-term side of KR unless next residue is P

Sequence Coverage: **6%**

Matched peptides shown in **Bold Red**

1 MAQVINTNSL SLTQNNLNK SQSALGTAIE RLSSGLRINS **AKDDAAGQAI**  
51 **ANR**FTANIKG LTQASRNAND GISIAQTTEG ALNEINNNLQ RVRELAVQSA  
101 NSTNSQSDLD SIQAEITQRL NEIDR**VSGQT QFNGVK**VLAQ DNTLTIQVGA  
151 NDGETIDIDL KQINSQTLGL DTLNVQKKYD VSDTAVAASY SDSKQNIAVP  
201 DKTAITAKIG AATSGGAGIK ADISFKDGKY YATVSGYDDA ADTDKNGTYE  
251 VTVAADTGAV TFATTPTVVD LPTDAKAVSK VQQNDTEIAA TNAKAALKAA  
301 GVADAEADTA TLVKMSYTDN NGKVIDGGFA FKTSGGYAA SVDKSGAASL  
351 KVTSYVDATT GTEKTAANKL GGADGKTEVV TIDGKTYNAS KAAGHNFKAQ  
401 PELAEAAATT TENPLQKIDA ALAQVDALRS **DLGAVQNR**FN SAITNLGNTV  
451 NNLSSARSRI EDSYATEVS NMSRAQILQQ AGTSVLAQAN QVPQNVLSLL  
501 R

Show predicted peptides also

Sort Peptides By ☒ Residue Number ☐ Increasing Mass ☐ Decreasing Mass

| Start - End      | Observed         | Mr(expt)         | Mr(calc)         | ppm       | Miss     | Sequence               |                                   |
|------------------|------------------|------------------|------------------|-----------|----------|------------------------|-----------------------------------|
| <b>43 - 53</b>   | <b>1101.5524</b> | <b>1100.5451</b> | <b>1100.5210</b> | <b>22</b> | <b>0</b> | <b>K.DDAAGQAIANR.F</b> | ( <a href="#">Ions score 58</a> ) |
| <b>126 - 136</b> | <b>1164.6100</b> | <b>1163.6027</b> | <b>1163.5935</b> | <b>8</b>  | <b>0</b> | <b>R.VSGQTQFNGVK.V</b> | ( <a href="#">Ions score 18</a> ) |
| <b>430 - 438</b> | <b>959.5074</b>  | <b>958.5001</b>  | <b>958.4832</b>  | <b>18</b> | <b>0</b> | <b>R.SDLGAVQNR.F</b>   | ( <a href="#">Ions score 25</a> ) |

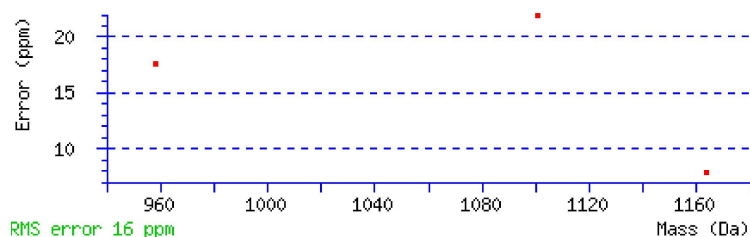

ID FLIC\_SALCH Reviewed; 501 AA.  
AC P06176; Q57N43;  
DT 01-JAN-1988, integrated into UniProtKB/Swiss-Prot.  
DT 23-JAN-2007, sequence version 3.  
DT 16-MAY-2012, entry version 86.  
DE RecName: Full=Flagellin;  
DE AltName: Full=Phase 1-C flagellin;  
GN Name=fliC; OrderedLocusNames=SCH\_1962;  
OS Salmonella choleraesuis (strain SC-B67).  
OC Bacteria; Proteobacteria; Gammaproteobacteria; Enterobacteriales;  
OC Enterobacteriaceae; Salmonella;  
OC Salmonella enterica subsp. enterica serovar Choleraesuis.  
OX NCBI\_TaxID=321314;  
RN [1]  
RP NUCLEOTIDE SEQUENCE [GENOMIC DNA].  
RC STRAIN=ATCC 7001;  
RX MEDLINE=86143833; PubMed=4093985; DOI=10.1016/0022-2836(85)90397-3;

RA Wei L.-N., Joys T.M.;  
 RT "Covalent structure of three phase-1 flagellar filament proteins of  
 RT Salmonella.";  
 RL J. Mol. Biol. 186:791-803(1985).  
 RN [2]  
 RP NUCLEOTIDE SEQUENCE [LARGE SCALE GENOMIC DNA].  
 RC STRAIN=SC-B67;  
 RX PubMed=15781495; DOI=10.1093/nar/gki297;  
 RA Chiu C.-H., Tang P., Chu C., Hu S., Bao Q., Yu J., Chou Y.-Y.,  
 RA Wang H.-S., Lee Y.-S.;  
 RT "The genome sequence of Salmonella enterica serovar Choleraesuis, a  
 RT highly invasive and resistant zoonotic pathogen.";  
 RL Nucleic Acids Res. 33:1690-1698(2005).  
 CC -!- FUNCTION: Flagellin is the subunit protein which polymerizes to  
 CC form the filaments of bacterial flagella.  
 CC -!- SUBCELLULAR LOCATION: Secreted. Bacterial flagellum.  
 CC -!- MISCELLANEOUS: Individual Salmonella serotypes usually alternate  
 CC between the production of 2 antigenic forms of flagella, termed  
 CC phase 1 and phase 2, each specified by separate structural genes.  
 CC -!- SIMILARITY: Belongs to the bacterial flagellin family.  
 CC -!- SEQUENCE CAUTION:  
 CC Sequence=CAA27129.1; Type=Erroneous initiation;  
 CC -----  
 CC Copyrighted by the UniProt Consortium, see <http://www.uniprot.org/terms>  
 CC Distributed under the Creative Commons Attribution-NoDerivs License  
 CC -----  
 DR EMBL; X03394; CAA27129.1; ALT\_INIT; Genomic\_DNA.  
 DR EMBL; AE017220; AAX65868.1; -; Genomic\_DNA.  
 DR PIR; S09637; S09637.  
 DR RefSeq; YP\_216949.1; NC\_006905.1.  
 DR ProteinModelPortal; P06176; -.  
 DR GeneID; 3334444; -.  
 DR GenomeReviews; AE017220\_GR; SCH\_1962.  
 DR KEGG; sec:SC1962; -.  
 DR PATRIC; 32324831; VBISalEnt136302\_2400.  
 DR eggNOG; COG1344; -.  
 DR KO; K02406; -.  
 DR OMA; NSTEDRE; -.  
 DR ProtClustDB; PRK08026; -.  
 DR BioCyc; SENT321314:SCH\_1962-MONOMER; -.  
 DR GO; GO:0009420; C:bacterial-type flagellum filament; IEA:InterPro.  
 DR GO; GO:0005576; C:extracellular region; IEA:UniProtKB-SubCell.  
 DR GO; GO:0005198; F:structural molecule activity; IEA:InterPro.  
 DR GO; GO:0001539; P:ciliary or flagellar motility; IEA:InterPro.  
 DR Gene3D; G3DSA:2.30.220.10; G3DSA:2.30.220.10; 1.  
 DR InterPro; IPR001492; Flagellin.  
 DR InterPro; IPR001029; Flagellin\_D0/D1.  
 DR InterPro; IPR014981; Flagellin\_D3.  
 DR InterPro; IPR023357; Flagellin\_f41\_beta-roll\_dom.  
 DR Pfam; PF00700; Flagellin\_C; 1.  
 DR Pfam; PF08884; Flagellin\_D3; 1.  
 DR Pfam; PF00669; Flagellin\_N; 1.  
 DR PRINTS; PR00207; FLAGELLIN.  
 PE 3: Inferred from homology;  
 KW Bacterial flagellum; Complete proteome; Secreted.  
 FT INIT\_MET 1 1 Removed (By similarity).  
 FT CHAIN 2 501 Flagellin.  
 FT /FTId=PRO\_0000182565.  
 FT CONFLICT 265 265 T -> R (in Ref. 1; CAA27129).  
 FT CONFLICT 296 307 Missing (in Ref. 1).  
 FT CONFLICT 348 348 A -> R (in Ref. 1; CAA27129).  
 FT CONFLICT 406 406 A -> R (in Ref. 1; CAA27129).  
 SQ SEQUENCE 501 AA; 52112 MW; 69F85666ADD866D3 CRC64;  
 MAQVINTNSL SLLTQNNLNK SQSALGTAIE RLSSGLRINS AKDDAAGQAI ANRFTANIKG  
 LTQASRNAND GISIAQTTEG ALNEINNNLQ RVRELAVQSA NSTNSQSDLD SIQAEITQRL  
 NEIDRVSGQT QFNGVKVLAQ DNTLTIQVGA NDGETIDIDL KQINSQTLGL DTLNVQKKYD  
 VSDTAVAASY SDSKQNIQAVP DKTAITAKIG AATSGGAGIK ADISFKDGKY YATVSGYDDA  
 ADTDKNGTYE VTVAADTGAV TFATPTTVVD LPTDAKAVSK VQQNDTEIAA TNAKAALKAA  
 GVADAEADTA TLVKMSYTDN NGKVIDGGFA FKTSGGYYAA SVDKSGAASL KVTSYVDATT  
 GTEKTAANKL GGADGKTEVV TIDGKTYNAS KAAGHNFKAQ PELAEAAAATT TENPLQKIDA  
 ALAQVDALRS DLGAVQNRFN SAITNLGNTV NNLSSARSRI EDSYATEVS NMSRAQILQQ  
 AGTSVLAQAN QVPQNVLSLL R
