# Supplementary material for: Relationship of Triamine-Biocide Tolerance of Salmonella enterica Serovar Senftenberg to Antimicrobial Susceptibility, Serum Resistance and Outer Membrane Proteins
Source: MDPI journal article supplement (doi:10.3390/ijms18071459), 2017-07-11
Supplement: s1 [file s1]

Mascot Search Results

Protein View

Match to: BAMA\_SALTI Score: 67 Expect: 0.0025  
Outer membrane protein assembly factor BamA OS=Salmonella typhi GN=bamA PE=3 SV=1

Nominal mass (M<sub>r</sub>): 89525; Calculated pI value: 4.92  
NCBI BLAST search of BAMA\_SALTI against nr  
Unformatted sequence string for pasting into other applications

Taxonomy: Salmonella enterica subsp. enterica serovar Typhi

Fixed modifications: Carbamidomethyl (C)  
Variable modifications: Oxidation (M)  
Cleavage by Trypsin: cuts C-term side of KR unless next residue is P  
Number of mass values searched: 50  
Number of mass values matched: 10  
Sequence Coverage: 19%

Matched peptides shown in Bold Red

1 MAMKKLIAS LLFSSATVYG AEGFVVKDIH FEGLQRVAVG AALLSMPVRT  
51 GDTVNDEDIS NTIRALFATG NFEDVRVLRD GNTLLVQVKE RPTIASITFS  
101 GNKSVKDDML KQNLEASGVR VGESLDRTTL SDIEKGLEDF YYSVGKYSAS  
151 VKAVVTPLPR NRVDLKLIVFO EGVSAKIQI NIVGNHAFST EELISHFQLR  
201 DEVPPWNNVVG DRKYQKQKLA GDLETLRSYY LDRGYARFNI DSTQVSLTPD  
251 KKGIIYITVNI TEGDQYKLSG VQVSGNLAGH SAEIEKLTKI EPGELYNGTK  
301 VTKMEDDIKK LLGRYGYAYP RVQSQPEIND ADKTVKLRVN VDAGNRFYVR  
351 KIRFEGNDTS KDSVLRREMR QMEGAWLGSD LVDQGKERLN RLGFETVDT  
401 DTQRVPGSPD QVDVVYKVE RNTGSFNFI GYGESGVSF QAGVQDNDWL  
451 GTQSVGNGING TKNDQTYSE LSVTNPFYFTV DGVSLGGRIF YNDFEADDAD  
501 LSDYTNKSYG TDVTLGFPIN EYNTLRAGLG YVHNKLSNMQ PQIAMDRIY  
551 SMGDDPDASDF AADDTFFNYG WTYNKLDRGY FPTDGSRVNL TGKVTIPGSD  
601 NEYYKVS LDT ATVPIDNDH KVVVLGRTRW GYDGLGCKE MPFYENFYAG  
651 GSSTVRGFSQ NTIGPKAVYK NGAHTSWDDD DDYEDCTQES GCKSDDAVGG  
701 NAMAVASLEF ITPTPFISEK YANSVRTSFF WDMGTVDWDTN WDPSSAFSDV  
751 PDYSDPGNIR MSAGIALQWM SPLGPLVFSY AQPFKKYDGD KAEQFQFNIG  
801 KTW

Show predicted peptides also

Sort Peptides By Residue Number Increasing Mass Decreasing Mass

| Start | End | Observed  | Mr (expt) | Mr (calc) | ppm | Miss | Sequence                    |
|-------|-----|-----------|-----------|-----------|-----|------|-----------------------------|
| 65    | 79  | 1707.7742 | 1706.7670 | 1706.9104 | -84 | 1    | R.ALFATGNFEDVRVLR.D         |
| 112   | 120 | 973.5347  | 972.5274  | 972.4988  | 29  | 0    | K.QNLEASGVR.V               |
| 136   | 146 | 1277.7129 | 1276.7056 | 1276.5976 | 85  | 0    | K.GLEDFYYSVGK.Y             |
| 163   | 176 | 1532.7870 | 1531.7797 | 1531.8610 | -53 | 1    | R.VDLKLIVFQEGVSAK.I         |
| 228   | 237 | 1263.6956 | 1262.6883 | 1262.6044 | 67  | 1    | R.SYILDRGYAR.F              |
| 268   | 286 | 1895.9570 | 1894.9497 | 1894.9748 | -13 | 0    | K.LSGVQVSGNLAGHSAEIEK.L     |
| 368   | 386 | 2150.0771 | 2149.0698 | 2148.9932 | 36  | 1    | R.EMRQMEGAWLGSDLVQCK.E      |
| 527   | 547 | 2342.9698 | 2341.9625 | 2342.1623 | -85 | 1    | R.AGLGYVHNKLSNMQFPQIAMDRI.Y |
| 576   | 587 | 1383.6925 | 1382.6852 | 1382.6579 | 20  | 1    | K.LDRGYFPTDGSR.V            |
| 671   | 693 | 2705.1059 | 2704.0986 | 2703.9562 | 53  | 0    | K.NGAHTSWDDDDYEDCTQESGCK.S  |

No match to: 601.4593, 856.5298, 870.5436, 1107.5504, 1128.5691, 1140.5835, 1157.5879, 1193.6068, 1219.6164, 1233.6807, 1235.6313, 1259.6806,

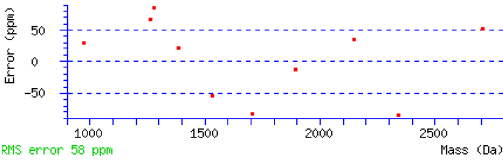

ID BAMA\_SALTI Reviewed; 803 AA.  
AC Q8Z9A3; Q7CBP9;  
DT 20-DEC-2005, integrated into UniProtKB/Swiss-Prot.  
DT 01-MAR-2002, sequence version 1.  
DT 13-JUN-2012, entry version 59.  
DE RecName: Full=Outer membrane protein assembly factor BamA;  
DE Flags: Precursor;  
GN Name=bamA; Synonyms=yaeT; OrderedLocusNames=STY0247, t0225;  
OS Salmonella typhi.  
OC Bacteria; Proteobacteria; Gammaproteobacteria; Enterobacteriales;  
OC Enterobacteriaceae; Salmonella.  
OX NCBI\_TaxID=90370;  
RN [1]  
RP NUCLEOTIDE SEQUENCE [LARGE SCALE GENOMIC DNA].  
RC STRAIN=CT18;  
RX MEDLINE=21534947; PubMed=11677608; DOI=10.1038/35101607;  
RA Parkhill J., Dougan G., James K.D., Thomson N.R., Pickard D., Wain J.,  
RA Churcher C.M., Mungall K.L., Bentley S.D., Holden M.T.G., Sebahia M.,  
RA Baker S., Basham D., Brooks K., Chillingworth T., Connerton P.,  
RA Cronin A., Davis P., Davies R.M., Dowd L., White N., Farrar J.,  
RA Feltham T., Hamlin N., Haque A., Hien T.T., Holroyd S., Jagels K.,  
RA Krogh A., Larsen T.S., Leather S., Moule S., O'Gaora P., Parry C.,  
RA Quail M.A., Rutherford K.M., Simmonds M., Skelton J., Stevens K.,  
RA Whitehead S., Barrell B.G.;  
RT "Complete genome sequence of a multiple drug resistant Salmonella  
RT enterica serovar Typhi CT18.";  
RL Nature 413:848-852(2001).  
RN [2]  
RP NUCLEOTIDE SEQUENCE [LARGE SCALE GENOMIC DNA].  
RC STRAIN=ATCC 700931 / Ty2;  
RX MEDLINE=22531367; PubMed=12644504;  
RX DOI=10.1128/JB.185.7.2330-2337.2003;  
RA Deng W., Liou S.-R., Plunkett G. III, Mayhew G.F., Rose D.J.,

RA Burland V., Kodoyianni V., Schwartz D.C., Blattner F.R.;  
 RT "Comparative genomics of Salmonella enterica serovar Typhi strains Ty2  
 RT and CT18.";  
 RL J. Bacteriol. 185:2330-2337(2003).  
 CC -!- FUNCTION: Part of the outer membrane protein assembly complex,  
 CC which is involved in assembly and insertion of beta-barrel  
 CC proteins into the outer membrane. Constitutes, with BamD, the core  
 CC component of the assembly machinery (By similarity).  
 CC -!- SUBUNIT: Part of the Bam complex, which is composed of the outer  
 CC membrane protein BamA, and four lipoproteins BamB, BamC, BamD and  
 CC BamE (By similarity).  
 CC -!- SUBCELLULAR LOCATION: Cell outer membrane (By similarity).  
 CC -!- SIMILARITY: Belongs to the BamA family.  
 CC -----  
 CC Copyrighted by the UniProt Consortium, see <http://www.uniprot.org/terms>  
 CC Distributed under the Creative Commons Attribution-NoDerivs License  
 CC -----  
 DR EMBL; AL627266; CAD08682.1; -; Genomic\_DNA.  
 DR EMBL; AE014613; AA067955.1; -; Genomic\_DNA.  
 DR RefSeq; NP\_454831.1; NC\_003198.1.  
 DR RefSeq; NP\_804106.1; NC\_004631.1.  
 DR ProteinModelPortal; Q8Z9A3; -.  
 DR SMR; Q8Z9A3; 21-351.  
 DR GeneID; 1067818; -.  
 DR GeneID; 1246736; -.  
 DR GenomeReviews; AE014613 GR; t0225.  
 DR GenomeReviews; AL513382 GR; STY0247.  
 DR KEGG; stt:t0225; -.  
 DR KEGG; sty:STY0247; -.  
 DR PATRIC; 18538311; VBISalEnt120419\_0247.  
 DR eggNOG; COG4775; -.  
 DR HOGENOM; HOG000261766; -.  
 DR KO; K07277; -.  
 DR OMA; NSKTRDE; -.  
 DR ProtClustDB; PRK11067; -.  
 DR BioCyc; SENT209261:T0225-MONOMER; -.  
 DR BioCyc; SENT220341:STY0247-MONOMER; -.  
 DR GO; GO:0009279; C:cell outer membrane; IEA:UniProtKB-SubCell.  
 DR GO; GO:0016021; C:integral to membrane; IEA:UniProtKB-KW.  
 DR GO; GO:0005886; C:plasma membrane; IEA:UniProtKB-KW.  
 DR HAMAP; MF\_01430; OM\_assembly\_BamA; 1; -.  
 DR InterPro; IPR000184; Bac\_surfAg\_D15.  
 DR InterPro; IPR023707; OM\_YaeT/YfiO\_complex\_suYaeT.  
 DR InterPro; IPR016474; OM\_YaeT/YfiO\_complex\_YaeT-rel.  
 DR InterPro; IPR010827; Surface\_Ag\_variable\_number.  
 DR Pfam; PF01103; Bac\_surface\_Ag; 1.  
 DR Pfam; PF07244; Surf\_Ag\_VNR; 5.  
 DR PIRSF; PIRSF006076; OM\_assembly\_OMP85; 1.  
 DR TIGRFAMs; TIGR03303; OM\_YaeT; 1.  
 PE 3: Inferred from homology;  
 KW Cell membrane; Cell outer membrane; Complete proteome; Membrane;  
 KW Signal; Transmembrane; Transmembrane beta strand.  
 FT SIGNAL 1 20 Potential.  
 FT CHAIN 21 803 Outer membrane protein assembly factor  
 FT BamA.  
 FT /FTid=PRO 0000045376.  
 SQ SEQUENCE 803 AA; 89467 MW; BBF8670070E67628 CRC64;  
 MAMKKLLIAS LLESSATVYG AEGFVVKDIH FEGLQRVAVG AALLSMPVRT GDTVNDEDIS  
 NTIRALFATG NFEDVRVLRD GNTLLVQVKE RPTIASITFS GNKSVKDDML KQNLEASGVR  
 VGESLDRITTL SDIEKLEDF YYSVGKYSAS VKAVVTPLPR NRVDLKLVFQ EGVSAKIQOI  
 NIVGNHAFST EELISHFQLR DEVFWNNVVG DRKYQKQKLA GDLETLSRY LDRGYARFNI  
 DSTQVSLTPD KKGITYITVNI TEGDQYKLSG VQVSGNLAGH SAEIEKLTKI EPGELYNGTK  
 VTKMEDDIKK LLGRYGYAYP RVQSQPEIND ADKTVKLRVN VDAGNRFYVR KIRFEGNDTS  
 KDSVLRREMR QMEGAWLGSD LVDQGKERLN RLGFFFVDT DTQRVPGPSD QVDVVYKVKE  
 RNTGSFNFI GYGTEGVSF QAGVQDNWL GTGYSVGING TKNDYQTYSE LSVTNPYFTV  
 DGVSLGGRIF YNDFEADDAD LSDYTNKSYG TDVTLGFFIN EYNTLRAGLG YVHNKLSNMQ  
 PQIAMDRYLE SMGDPDASDF AADDFTFNYG WTYNKLDRGY FPTDGSRVNL TGKVTIPGSD  
 NEYYKVS LDT ATYVPIDNDH KWVVLGRTRW GYGDGLGKGE MPFYENFYAG GSSTVRGFQS  
 NTIGPKAVYK NGAHTSWDDD DDYEDCTQES GCKSDAVGG NAMAVASLEF ITPTPFISEK  
 YANSVTSFF WDMGTVDN WDPSSAPSDV PDYSDPGNIR MSAGIALQWM SPLGPLVFSY  
 AQPFPKYDGD KAEQFPQFNIG KTW
